# Supplementary material for: Influence of Short Cationic Lipopeptides with Fatty Acids of Different Chain Lengths on Bacterial Biofilms Formed on Polystyrene and Hydrogel Surfaces
Source: MDPI journal article supplement (doi:10.3390/pharmaceutics11100506), 2019-10-01
Supplement: s1 [file s1]

# Supplementary Materials: Influence of Short Cationic Lipopeptides with Fatty Acids of Different Chain Lengths on Bacterial Biofilms Formed on Polystyrene and Hydrogel Surfaces

Malgorzata Anna Paduszynska, Magdalena Maciejewska, Damian Neubauer, Krzysztof Golacki, Magdalena Szymukowicz, Marta Bauer and Wojciech Kamysz

## Molecular structures

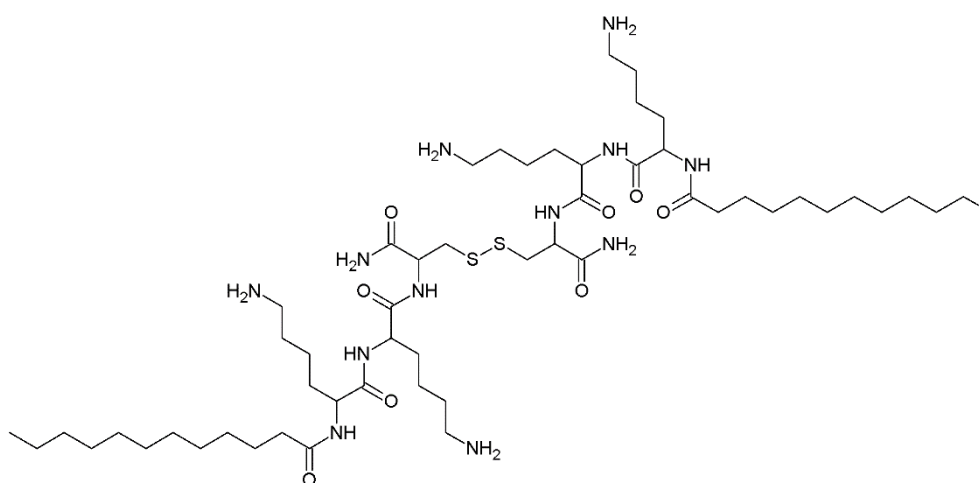

**Figure S1.** Molecular structure of C<sub>12</sub>-KKC-NH<sub>2</sub> dimer.

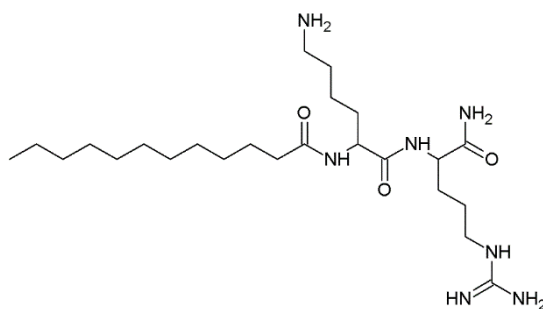

**Figure S2.** Molecular structure of C<sub>12</sub>-KR-NH<sub>2</sub>.

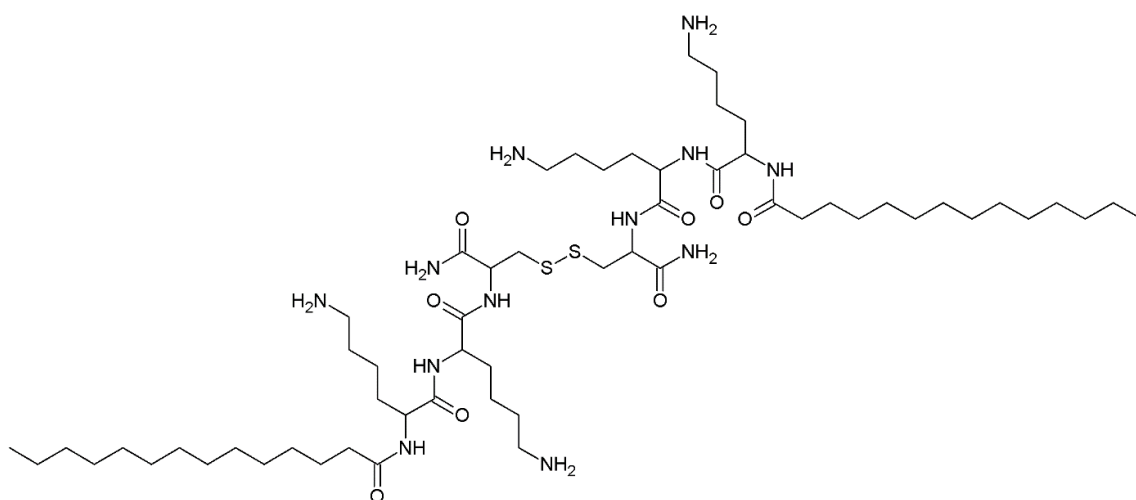

**Figure S3.** Molecular structure of C<sub>14</sub>-KKC-NH<sub>2</sub> dimer.

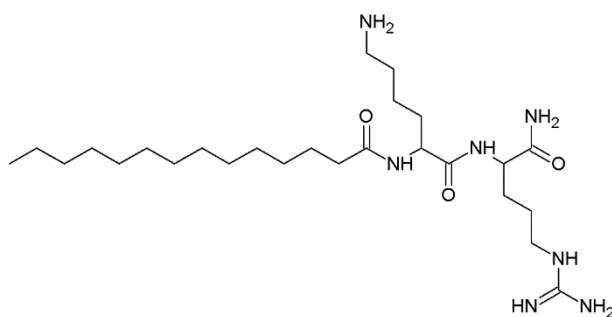

**Figure S4.** Molecular structure of C<sub>14</sub>-KR-NH<sub>2</sub>.

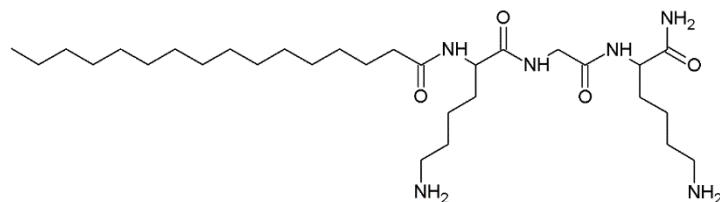

**Figure S5.** Molecular structure of C<sub>16</sub>-KGK-NH<sub>2</sub>.

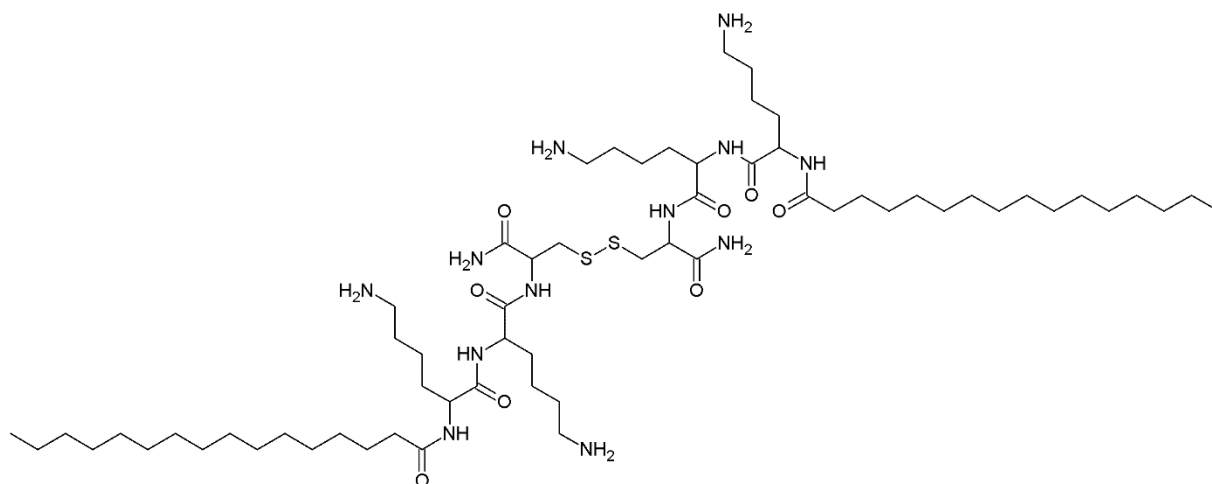

**Figure S6.** Molecular structure of C<sub>16</sub>-KKC-NH<sub>2</sub> dimer.

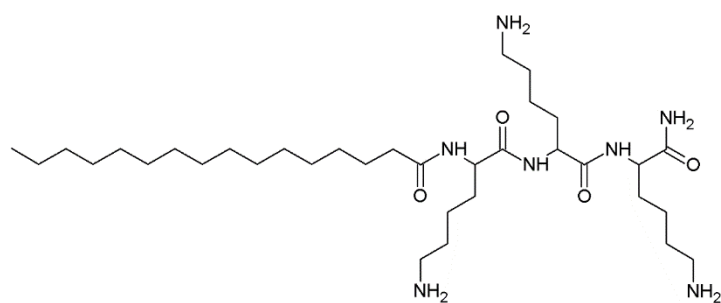

**Figure S7.** Molecular structure of C<sub>16</sub>-KKK-NH<sub>2</sub>.

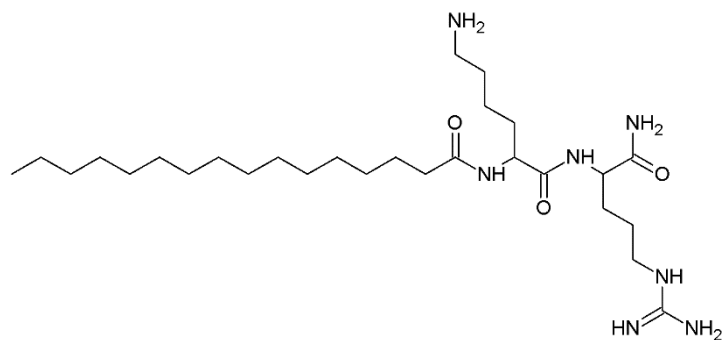

**Figure S8.** Molecular structure of C<sub>16</sub>-KR-NH<sub>2</sub>.

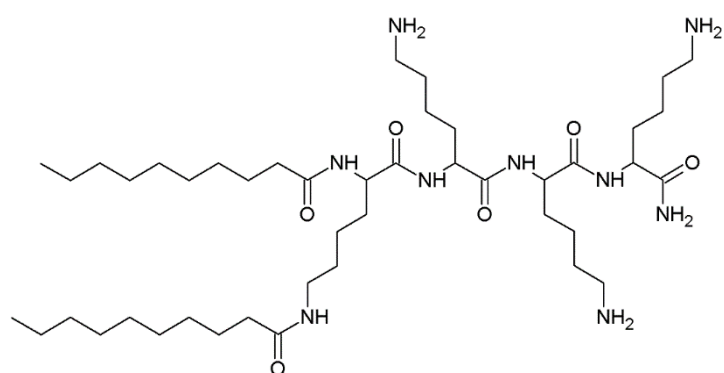

**Figure S9.** Molecular structure of (C<sub>10</sub>)<sub>2</sub>-KKKK-NH<sub>2</sub>.
